# Supplementary material for: Multilayer hybrid films consisting of alternating graphene and titanium dioxide for high-performance supercapacitors
Source: Royal Society of Chemistry journal article supplement (doi:10.1039/c2tc00563h), 2012-12-14
Supplement: c2tc00563h.pdf [file c2tc00563h.pdf]

## Supplementary Information

### **Multilayer hybrid films consisting of alternating graphene and titanium dioxide for high-performance supercapacitors**

Wen-wen Liu,<sup>a, b, c</sup> Xing-bin Yan\*,<sup>a, b</sup> Qun-ji Xue<sup>b</sup>

*a Laboratory of Clean Energy Chemistry and Materials, Lanzhou Institute of Chemical Physics, Chinese Academy of Sciences, Lanzhou 730000, P. R. China*

*b State Key Laboratory of Solid Lubrication, Lanzhou Institute of Chemical Physics, Chinese Academy of Sciences, Lanzhou 730000, P. R. China*

*c Graduate University of Chinese Academy of Sciences, Beijing 100080, China*

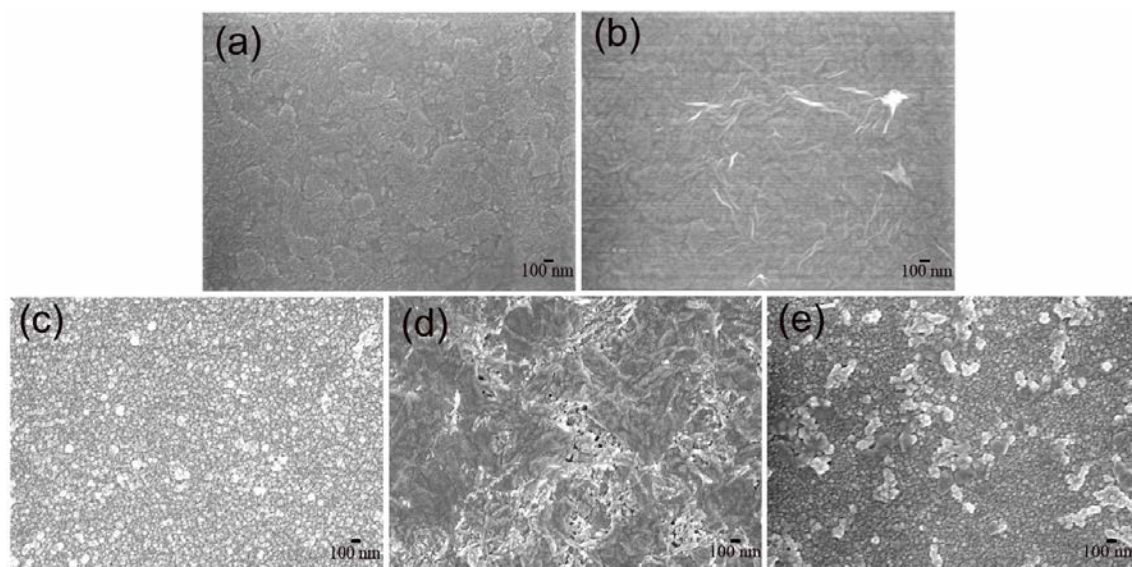

**Fig.S1** SEM images of (a) ITO glass, (b) [GNS]<sub>15</sub>, (c) [TiO<sub>2</sub>]<sub>15</sub>, (d) [GNS/TiO<sub>2</sub>]<sub>15</sub> and (e) [GNS]<sub>15</sub>+ [TiO<sub>2</sub>]<sub>15</sub> multilayer films.

---

\* Corresponding author. Tel/Fax: +86 931 4968055.

E-mail address: [xbyan@licp.cas.cn](mailto:xbyan@licp.cas.cn) (X.B. Yan)

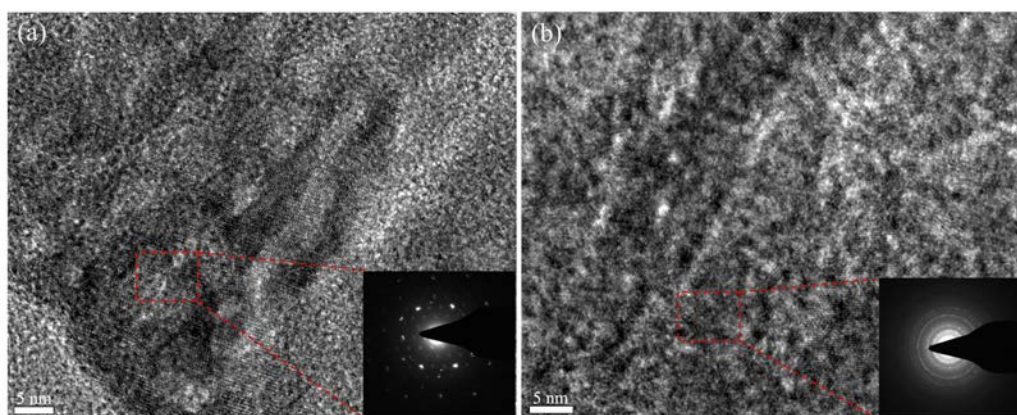

**Fig. S2** TEM images of TiO<sub>2</sub> powder and [GNS/TiO<sub>2</sub>]<sub>15</sub> film. The inset is the responding electron diffractions

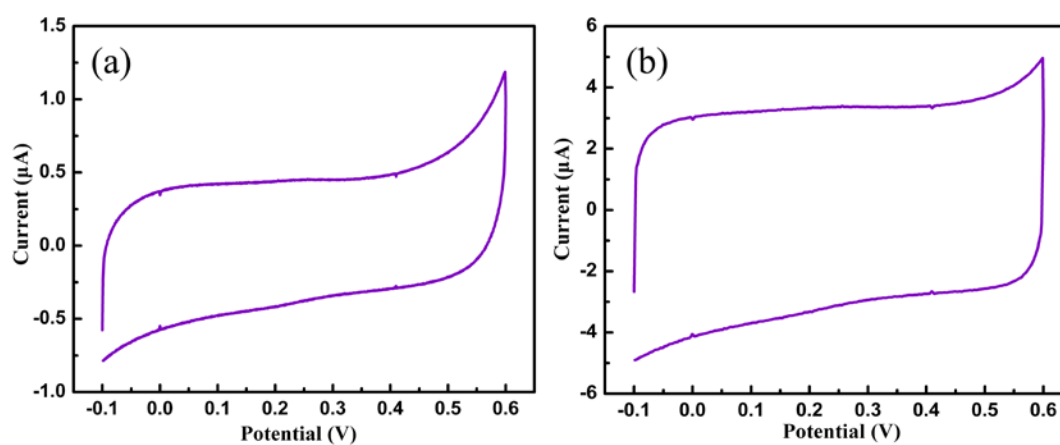

**Fig.S3** CV curves of bare ITO electrode in 0.5 M Na<sub>2</sub>SO<sub>4</sub> aqueous electrolyte with the scan rates: (a) 10 mV·s<sup>-1</sup> and (b) 100 mV·s<sup>-1</sup>.

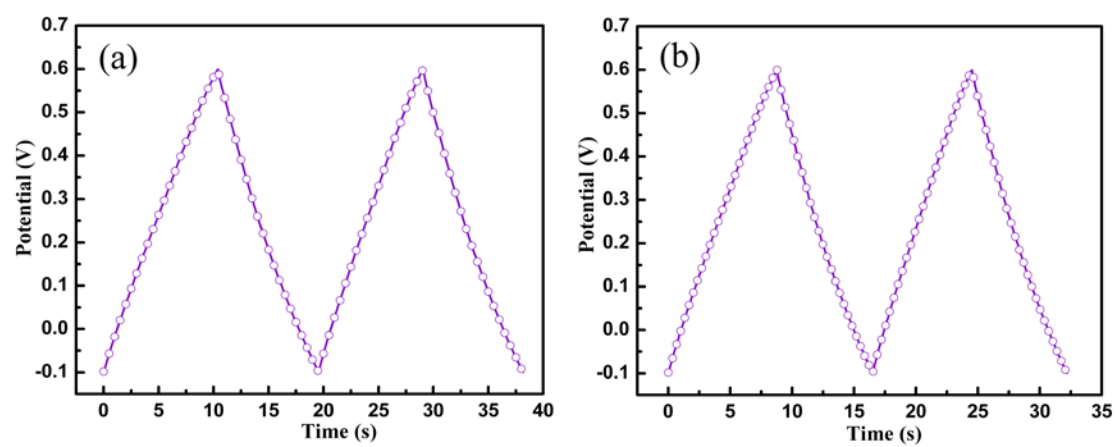

**Fig.S4** GCD curves of bare ITO electrode in 0.5 M Na<sub>2</sub>SO<sub>4</sub> aqueous electrolyte with the current densities: (a)  $5 \times 10^{-6}$  A and (b)  $5 \times 10^{-5}$  A.
